# Supplementary material for: Alteration of lipid bilayer mechanics by volatile anesthetics: Insights from μs-long molecular dynamics simulations
Source: PubMed Central journal article supplement — iScience. 2022 Feb 18;25(3):103946. doi: 10.1016/j.isci.2022.103946 (PMC8898909; doi:10.1016/j.isci.2022.103946), 2022-02-18
Supplement: mmc1.pdf [file mmc1.pdf]

iScience, Volume 25

## **Supplemental information**

### **Alteration of lipid bilayer mechanics by volatile anesthetics: Insights from $\mu$ s-long molecular dynamics simulations**

**Eric A. Zizzi, Marco Cavaglia, Jack A. Tuszynski, and Marco A. Deriu**

# Supplementary Information

## Density Profiles

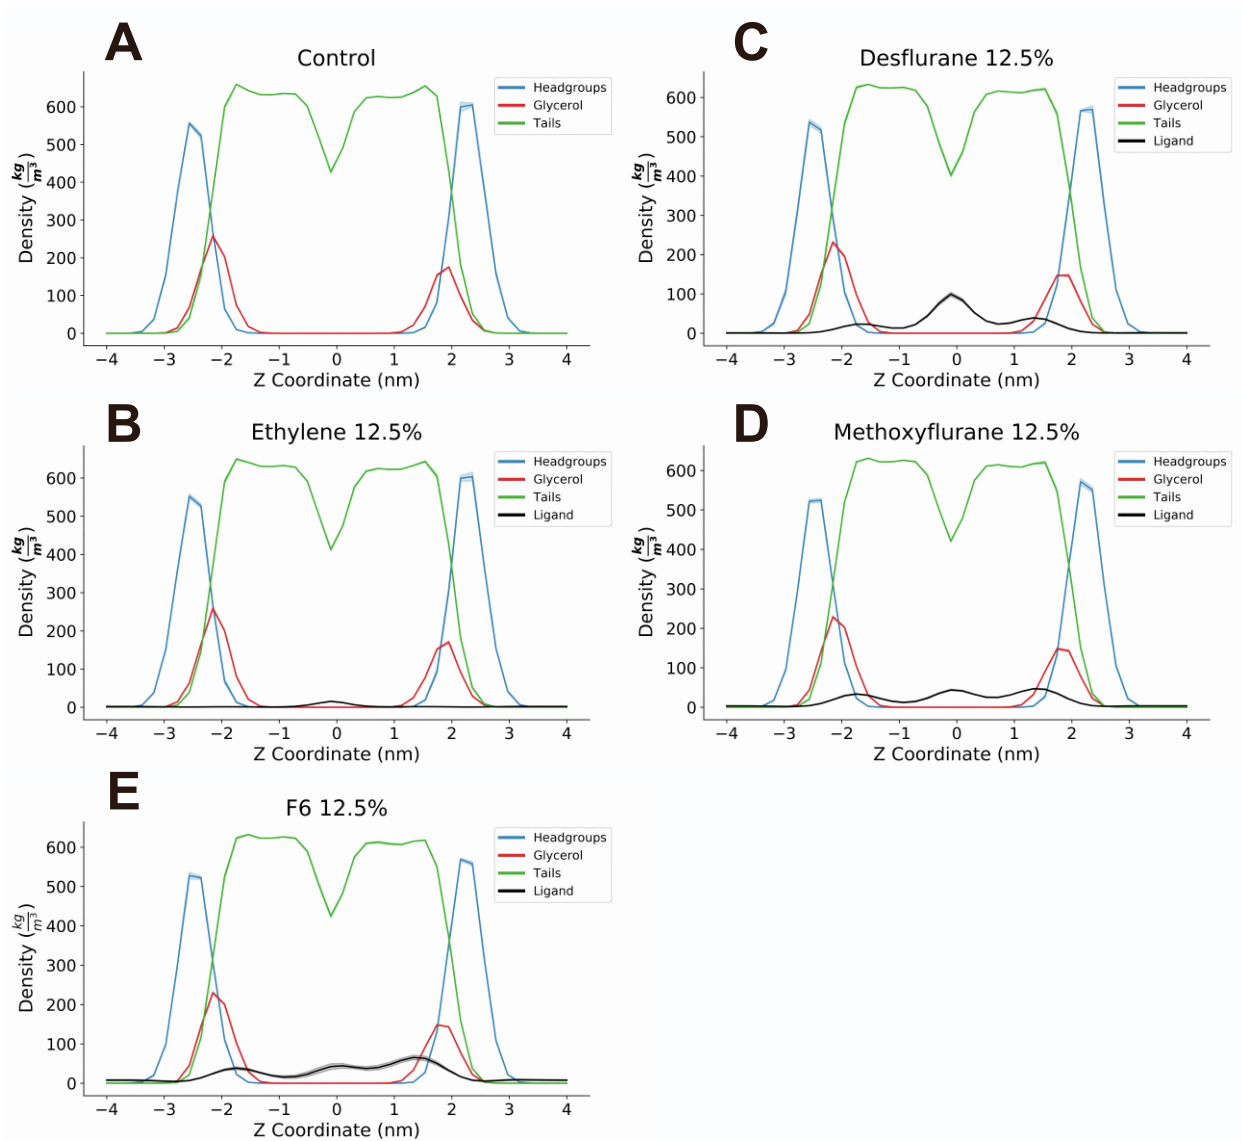

Figure S1. Density profiles of control simulations (A) and ligands at 12.5% molar ratio: (B) Ethylene; (C) Desflurane; (D) Methoxyflurane; (E) F6. Densities of lipid headgroups, glycerol groups, hydrophobic lipid tails and ligands are highlighted. Shaded areas represent 95% confidence intervals. Related to Figure 3.

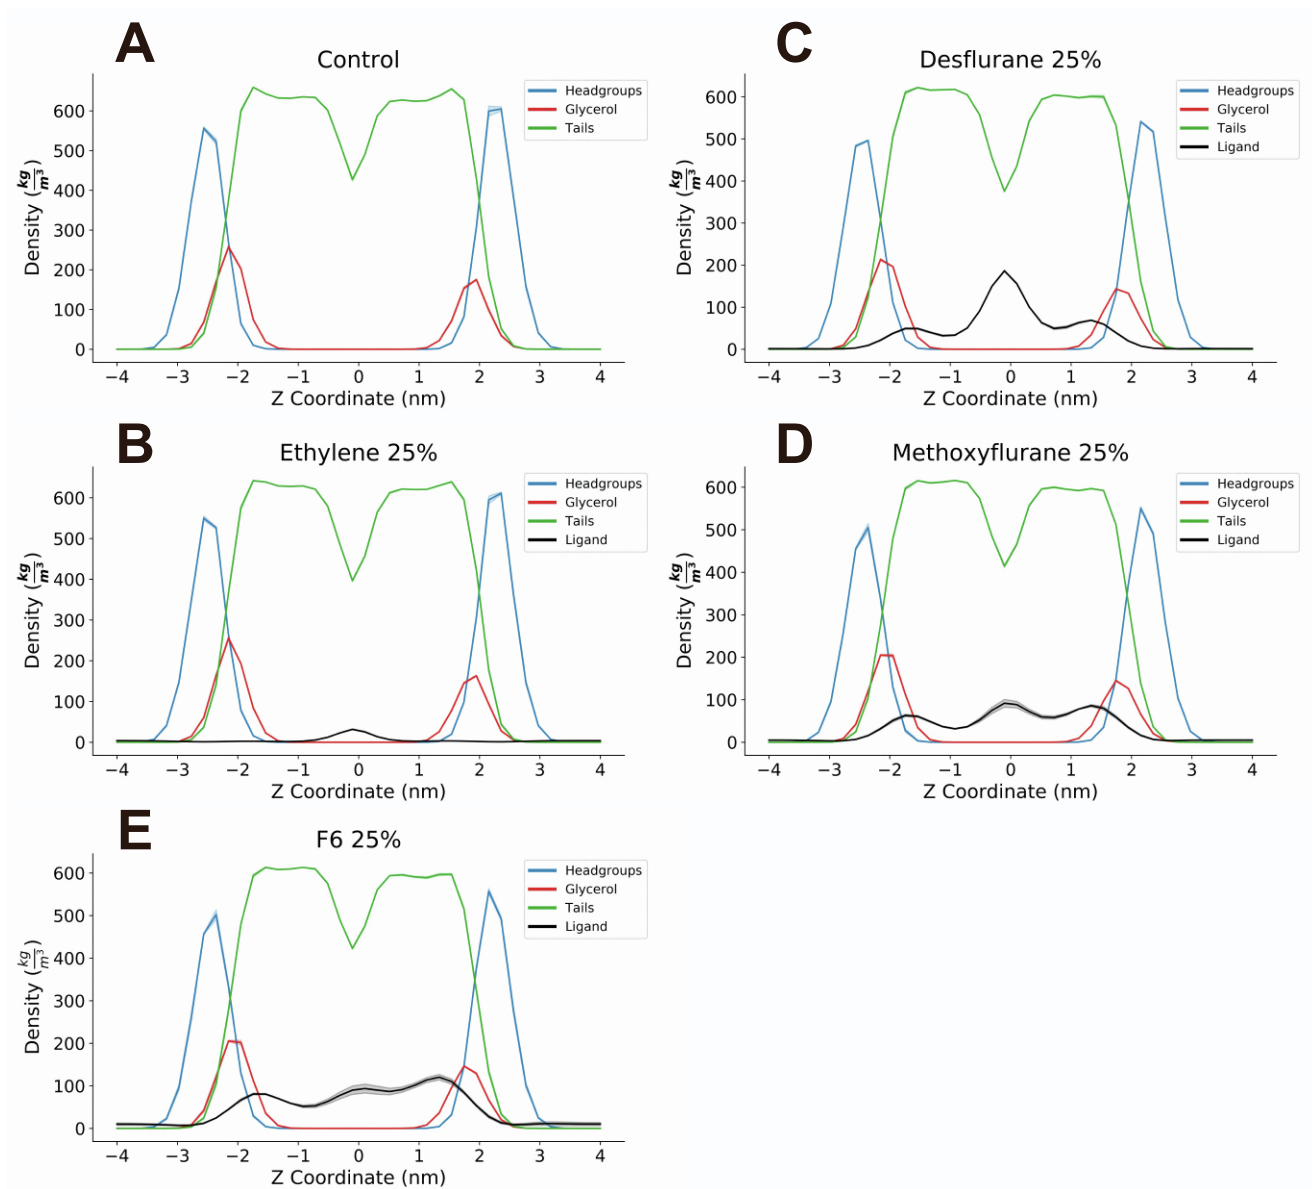

Figure S2. Density profiles of control simulations (A) and ligands at 25% molar ratio: (B) ethylene; (C) desflurane; (D) methoxyflurane; (E) F6. Densities of lipid headgroups, glycerol groups, hydrophobic lipid tails and ligands are highlighted. Shaded areas represent 95% confidence intervals. Related to Figure 3.

## Order Parameters

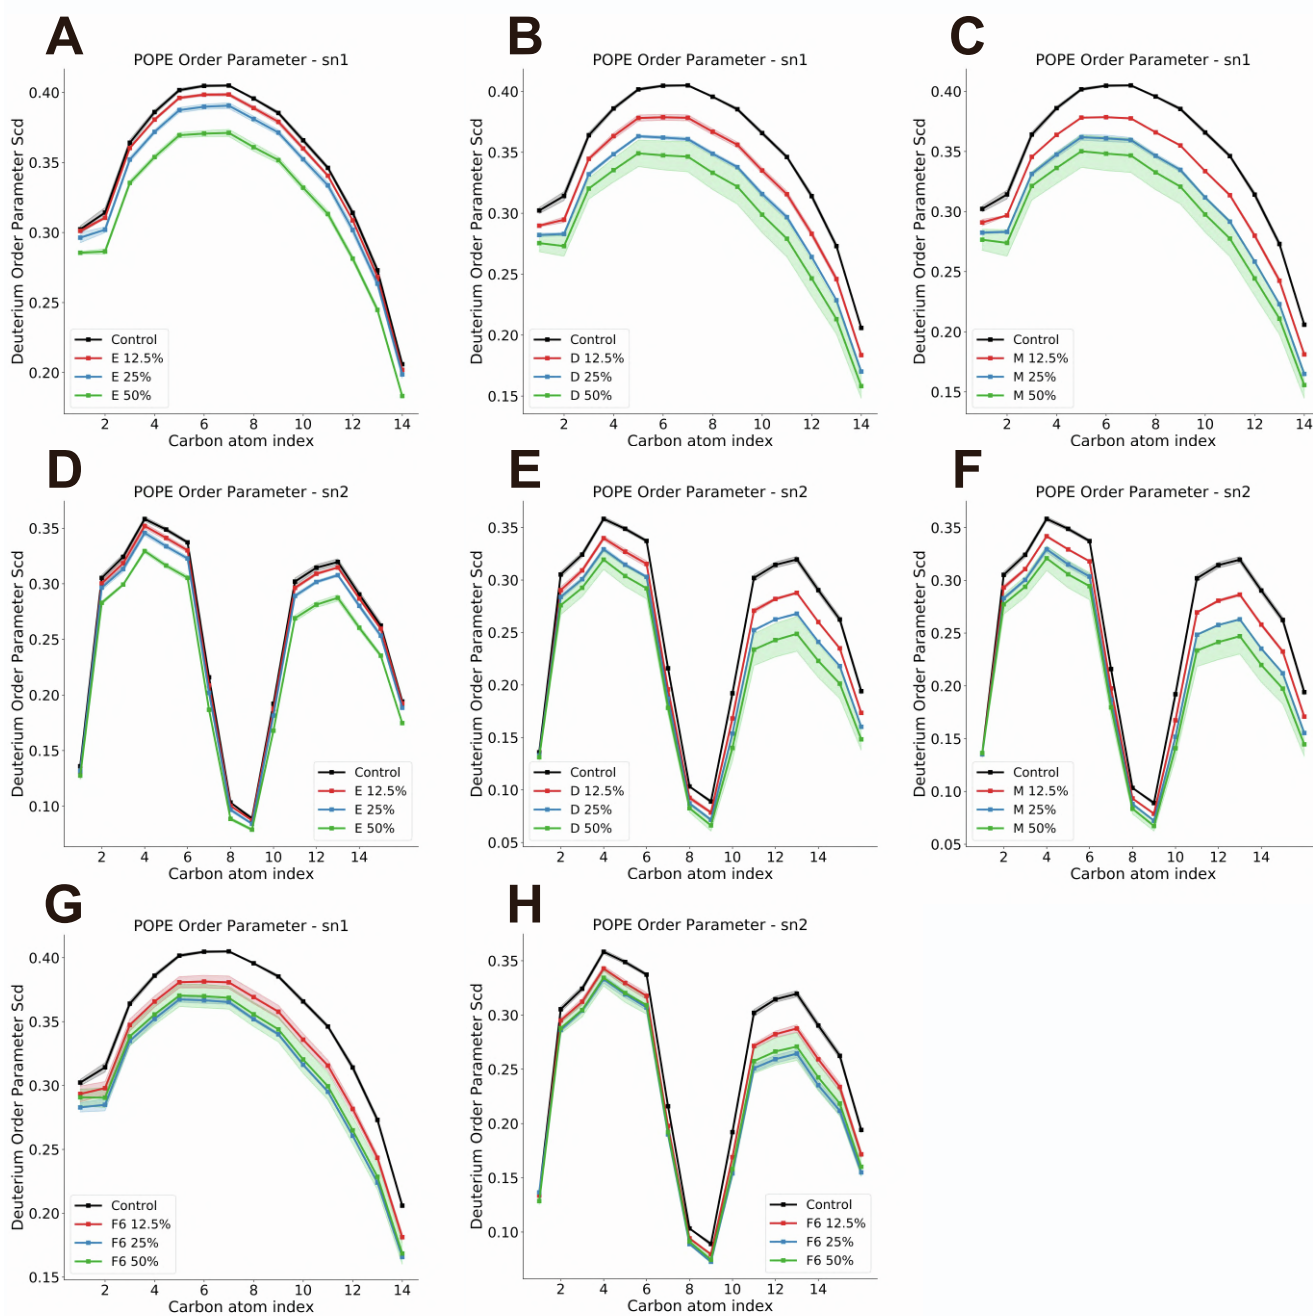

Figure S3. Lipid tail order parameters for POPE sn1 and sn2 chains, with different ligands: (A) and (D) ethylene; (B) and (E) desflurane; (C) and (F) methoxyflurane; (G) and (H) F6. Shaded intervals correspond to 95% confidence intervals. Related to Figure 5.

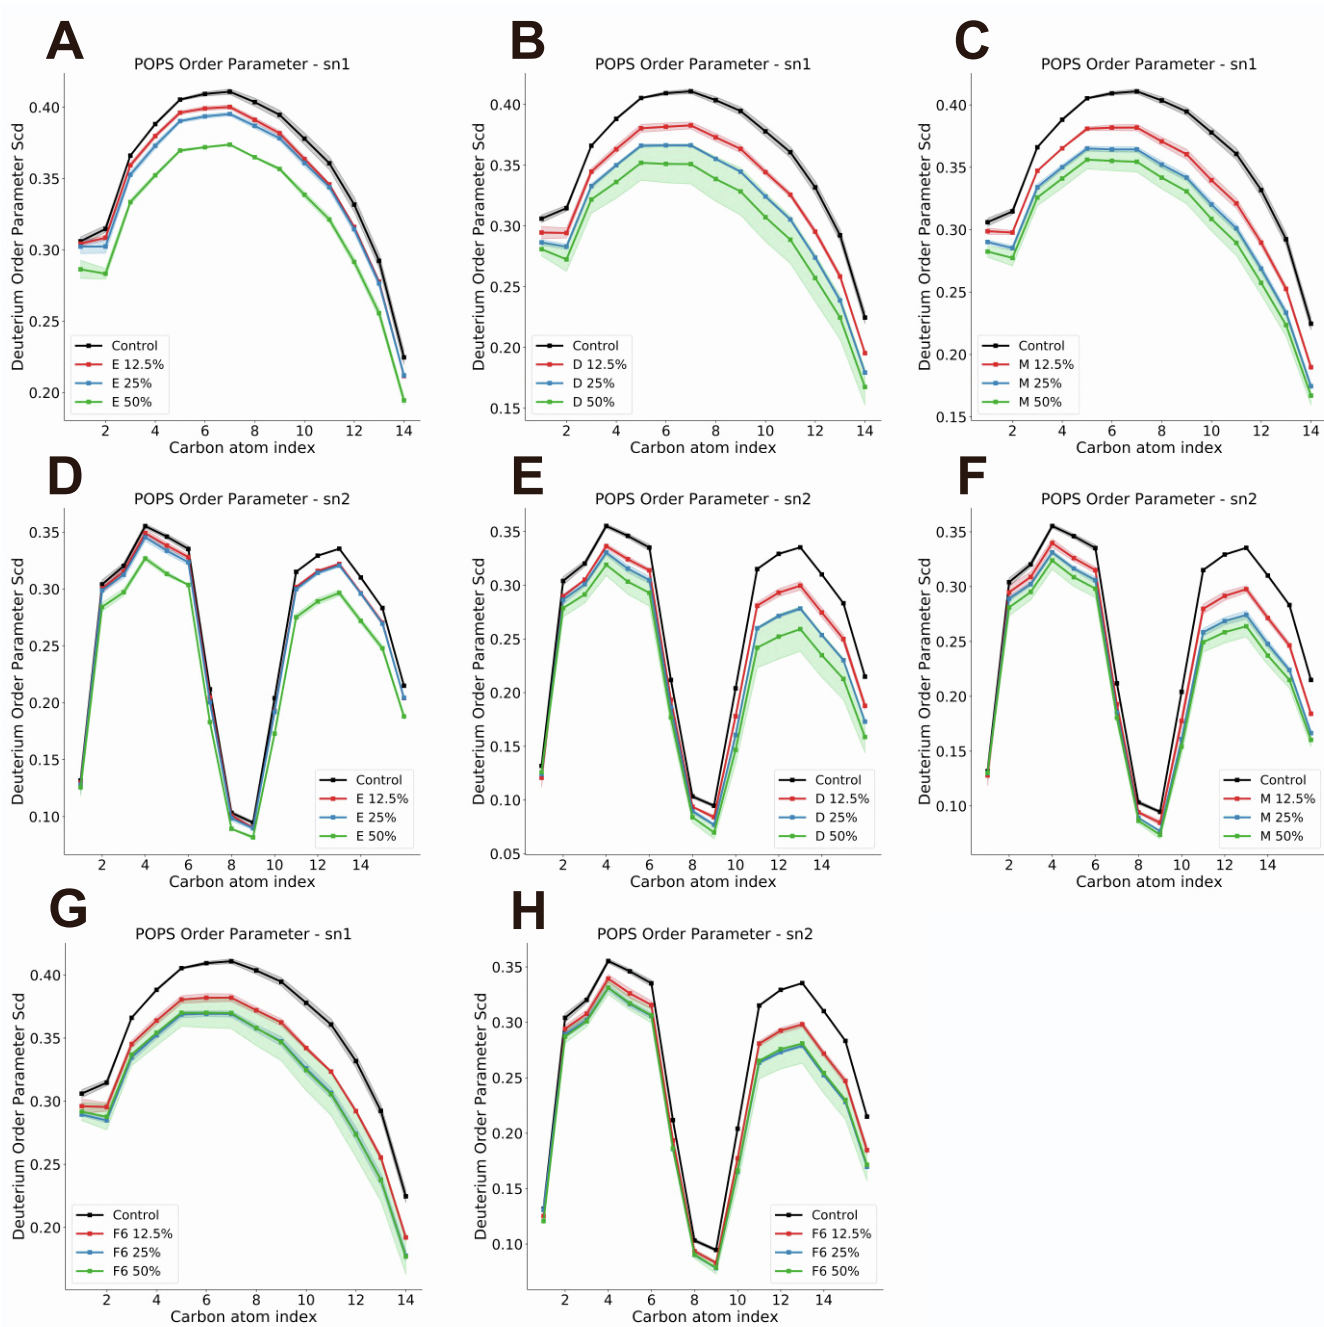

Figure S4. Lipid tail order parameters for POPS sn1 and sn2 chains, with different ligands: (A) and (D) ethylene; (B) and (E) desflurane; (C) and (F) methoxyflurane; (G) and (H) F6. Shaded intervals correspond to 95% confidence intervals. Related to Figure 5.

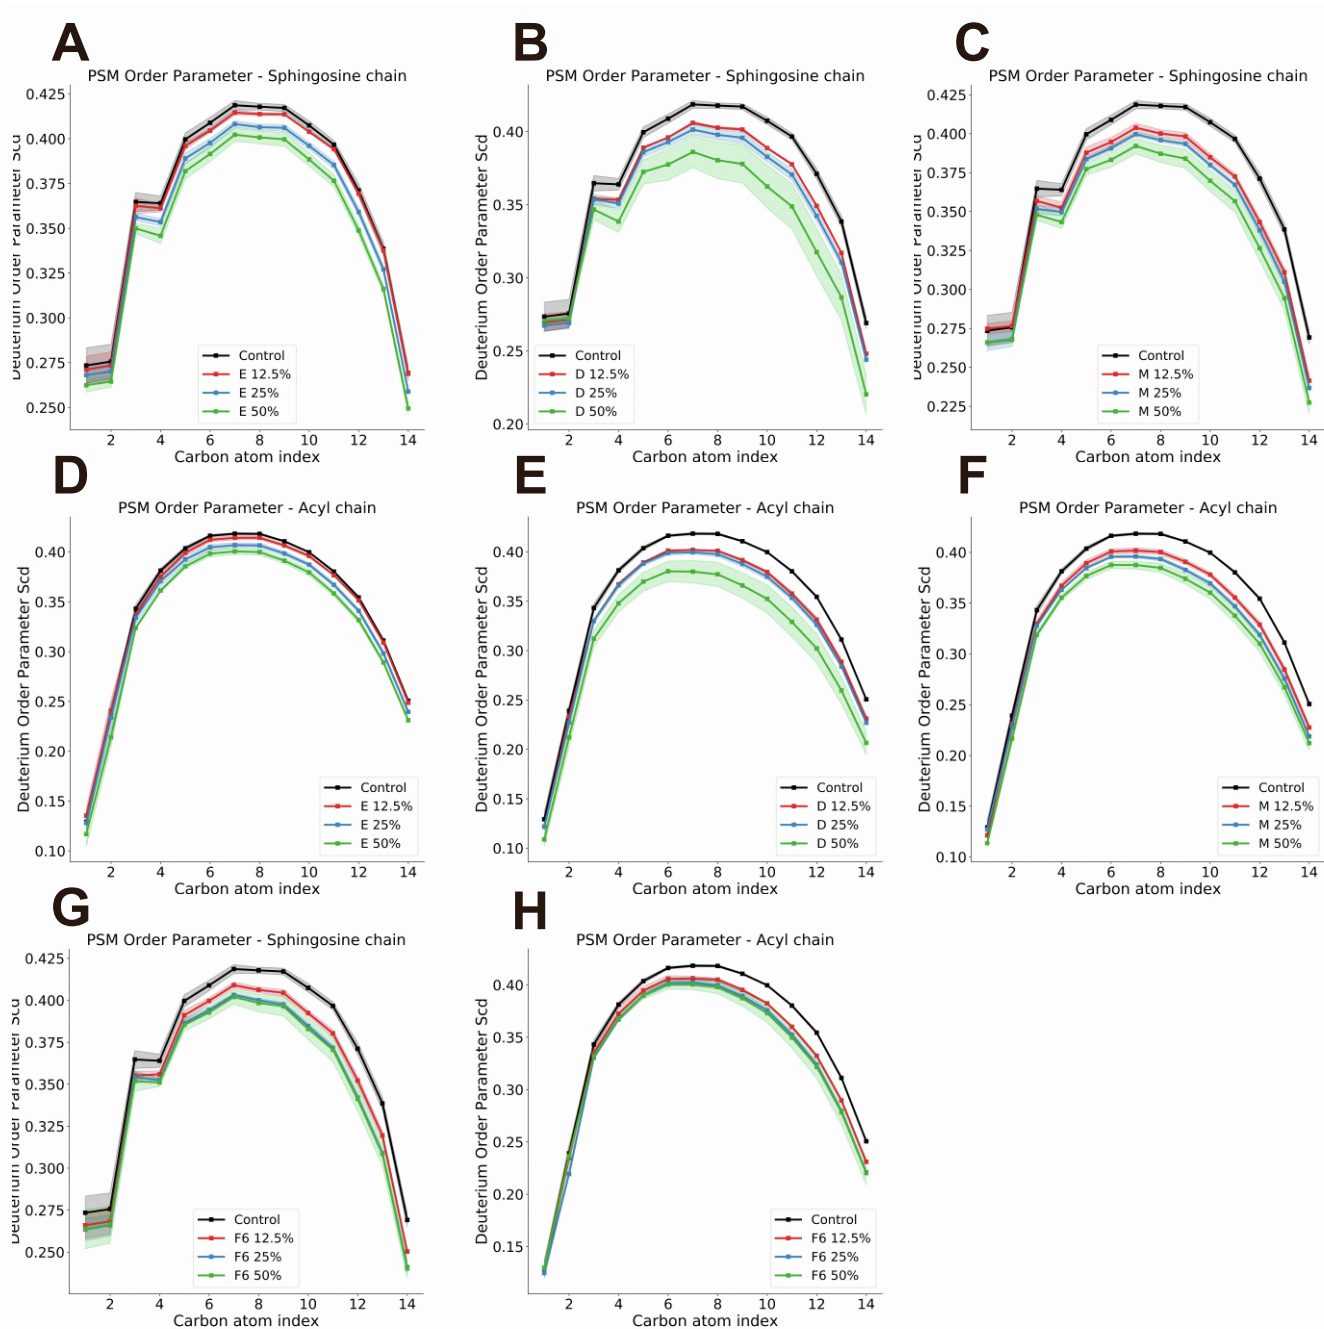

Figure S5. Lipid tail order parameters for PSM sphingosine chain and acyl chain, with different ligands: (A) and (D) ethylene; (B) and (E) desflurane; (C) and (F) methoxyflurane; (G) and (H) F6. Shaded intervals correspond to 95% confidence intervals. Related to Figure 5.
